# Supplementary material for: In-depth Profiling and Quantification of the Lysine Acetylome in Hepatocellular Carcinoma with a Trapped Ion Mobility Mass Spectrometer
Source: PubMed Central journal article supplement — Mol Cell Proteomics. 2022 Jun 8;21(8):100255. doi: 10.1016/j.mcpro.2022.100255 (PMC9294201; doi:10.1016/j.mcpro.2022.100255), 2022-06-08
Supplement: mmc1.pdf [file mmc1.pdf]

**Supplemental Materials for**

**In-depth Profiling and Quantification of the Lysine Acetylome in**

**Hepatocellular Carcinoma with a Trapped Ion Mobility Mass**

**Spectrometer**

Jia Xu, Xinyu Guan, Xiaodong Jia, Hongyan Li, Ruibing Chen, and Yinying Lu

**This PDF file includes:**

Tables S1 to S2

Figures S1 to S6

**Other Supplemental Materials for this manuscript include:**

Tables S3 to S8

**Table S1.** List of the specimens and the clinical information.

| Patient ID | Gender | Age (years) | Diagnose | Laennec Stage | Specimens  |
|------------|--------|-------------|----------|---------------|------------|
| HG_H1      | M      | 56          | HCC      | F4C           | Tumor, NAT |
| HG_H10     | M      | 42          | HCC      | IV            | Tumor, NAT |
| HG_H2      | M      | 63          | HCC      | F4C           | Tumor, NAT |
| HG_H3      | M      | 48          | HCC      | IV            | Tumor, NAT |
| HG_H4      | M      | 53          | HCC      | F4C           | Tumor, NAT |
| HG_H6      | M      | 69          | HCC      | F4A           | Tumor, NAT |
| LC4        | M      | 53          | HCC      | IV            | Tumor, NAT |
| LC6        | M      | 46          | HCC      | NA            | Tumor, NAT |

NA, non-available; F, female; M, male; NAT, Normal adjacent tissue.

**Table S2.** Sequences of the DNA primers used for qRT-PCR and siRNAs for SIRT2 knockdown.

| Name        | Sequence (5'-3')                                                     |
|-------------|----------------------------------------------------------------------|
| GAPDH       | Forward: GGTGAAGGTCGGAGTCAACG<br>Reverse: CAAAGTTGTCATGGATGACC       |
| SIRT2       | Forward: GGCATACAGCAGTAAACACAAC<br>Reverse: CTAGCTATGATCCTAACCCAAG   |
| siSIRT2-1 * | Sense: GCCAACCAUCUGUCACUACUUTT<br>Antisense: AAGUAGUGACAGAUGGUUGGCTT |
| siSIRT2-2   | Sense: CCUGCUCUCAACCAGGAGAATT<br>Antisense: UUCUCCUUGUUGAUGAGCAGGTT  |
| siSIRT2-3   | Sense: CCUGUGGCUAAGUAAACCAUATT<br>Antisense: UAUGGUUUACUUAGCCACAGGTT |

\* Selected for the cellular experiments.

## Supplemental Figures

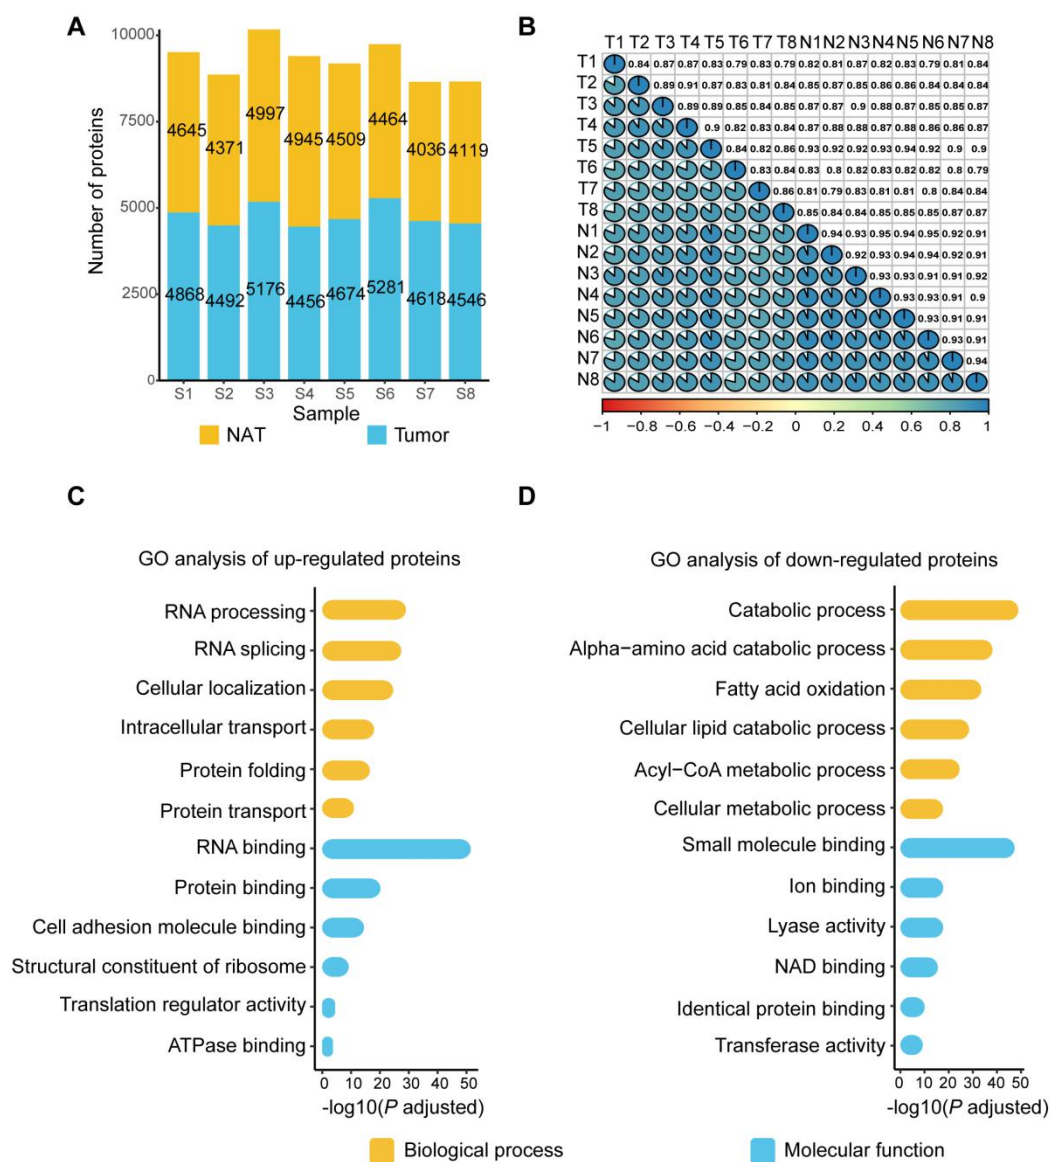

Supplemental Figure S1. Quantitative proteomics analysis of the HCC tumors and NATs. **A**, Numbers of proteins identified in tumors and NATs from individual patients. **B**, Correlation analysis of protein intensities between samples. Pearson correlation analysis was conducted. Biological process and molecular function analysis of the up-regulated (**C**) and down-regulated (**D**) proteins. The analysis was conducted by g:Profiler (<https://biit.cs.ut.ee/gprofiler/gost>).

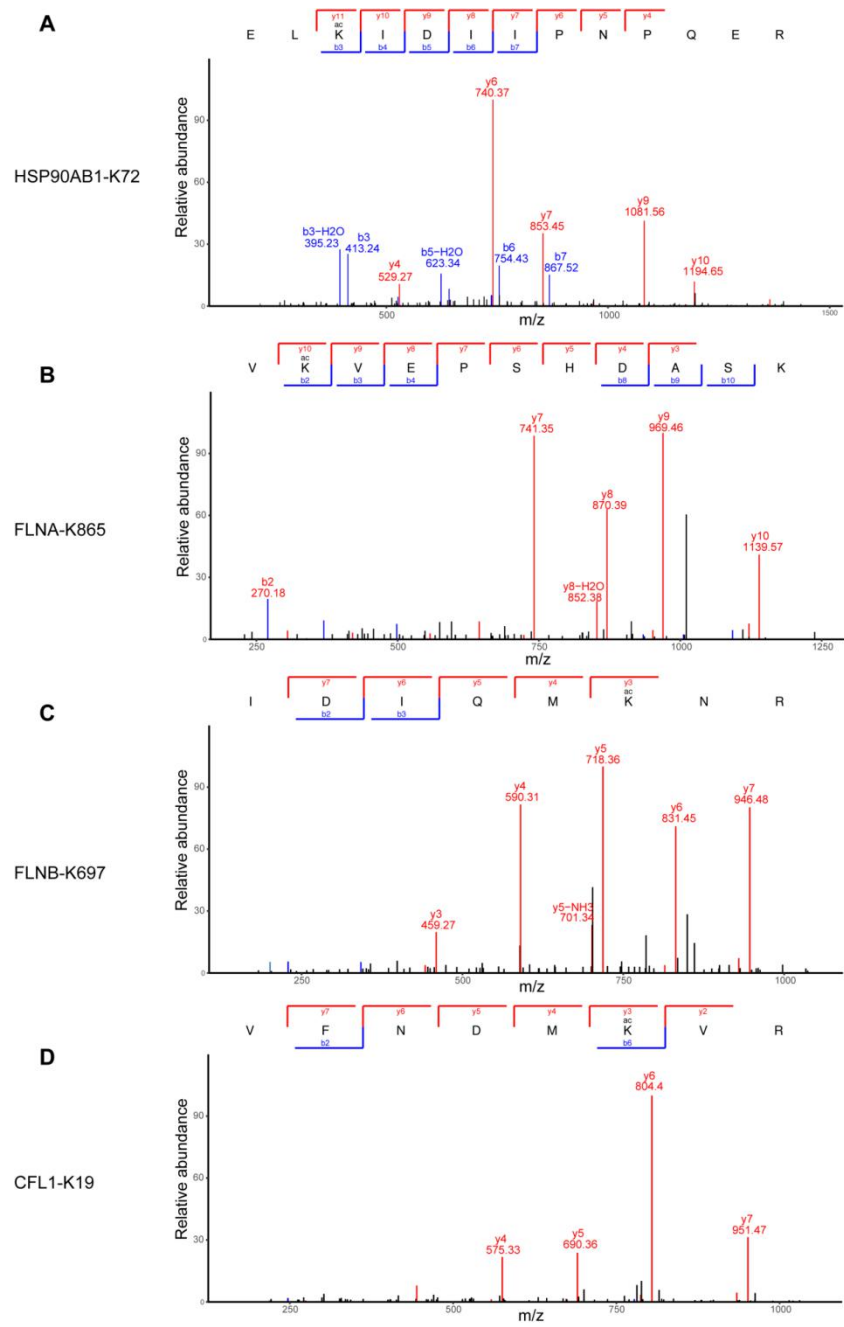

Supplemental Figure S2. MS/MS spectra of selected tumor-specific acetylpeptides. **A**, HSP90AB1-K72; **B**, FLNA-K865; **C**, FLNB-K697; **D**, CFL1-K19.

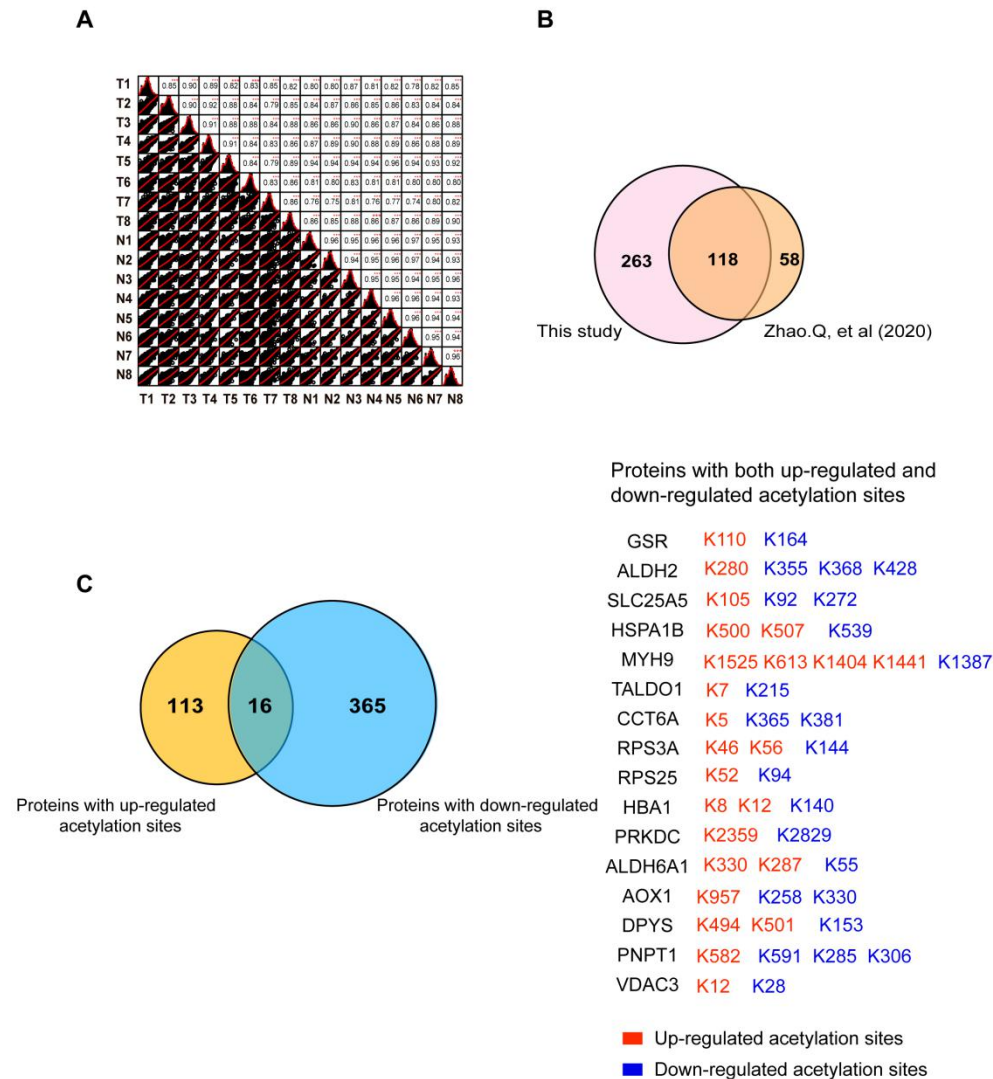

Supplemental Figure S3. Identification and quantification of the K-acetylome in HCC. **A**, Correlation analysis of K-acetylpeptide intensities between samples. Pearson correlation analysis was conducted. **B**, Comparison of our results and a previous report of HCC acetylproteome study (26). **C**, Proteins containing both up-regulated and down-regulated K-acetylation sites.

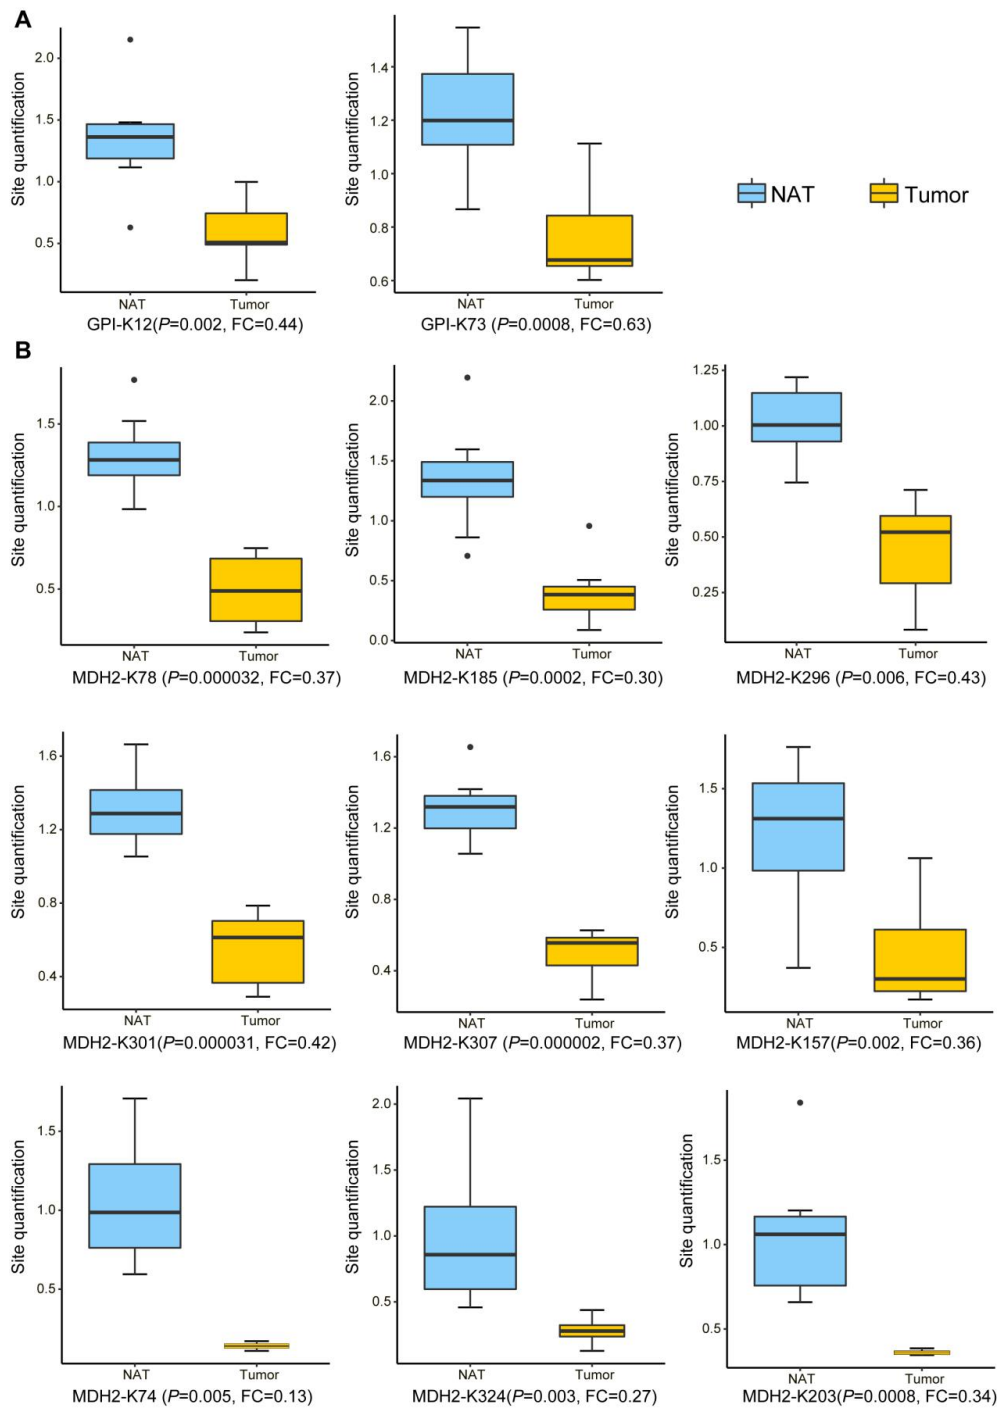

Supplemental Figure S4. Proteins with K-acetylation sites down-regulated in tumors.

**A**, Quantification of the two K-acetylation sites in GPI. **B**, Quantification of the nine K-acetylation sites in MDH2.

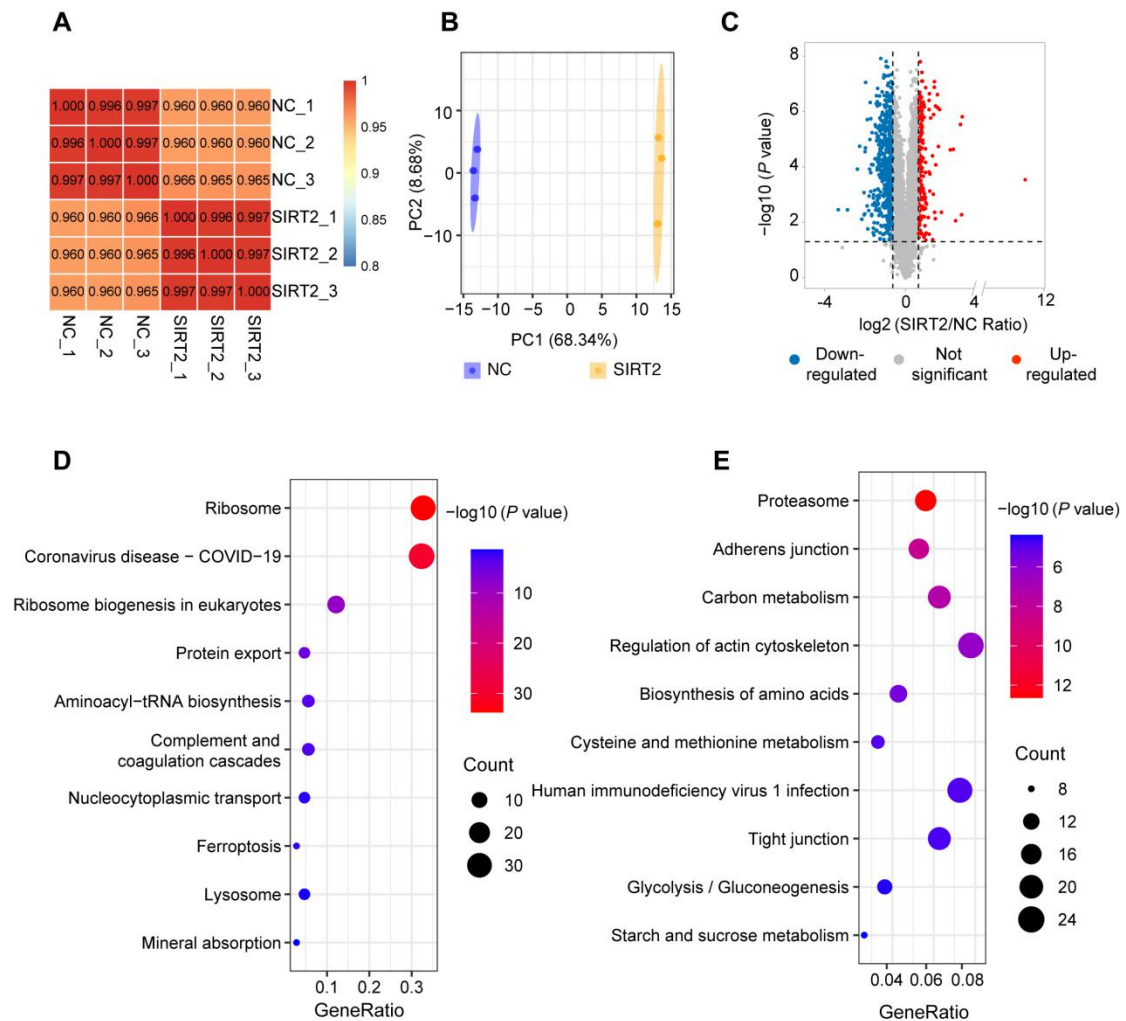

Supplemental Figure S5. Quantitative analysis of the proteome changes in response to SIRT2 overexpression in Huh7 cells. **A**, Correlation analysis of protein intensities between samples. Pearson correlation analysis was conducted. **B**, Principal component analysis visualization of protein expression in SIRT2-overexpressing cells and NC cells. **C**, Volcano plot illustrating differentially expressed proteins (fold change > 1.5,  $P < 0.05$ , by two-sided Student's  $t$ -test). **D** and **E**, KEGG pathway enrichment analysis of the up-regulated (**C**) and down-regulated (**D**) proteins. The analysis was conducted by clusterProfiler. (version: 3.16.0).



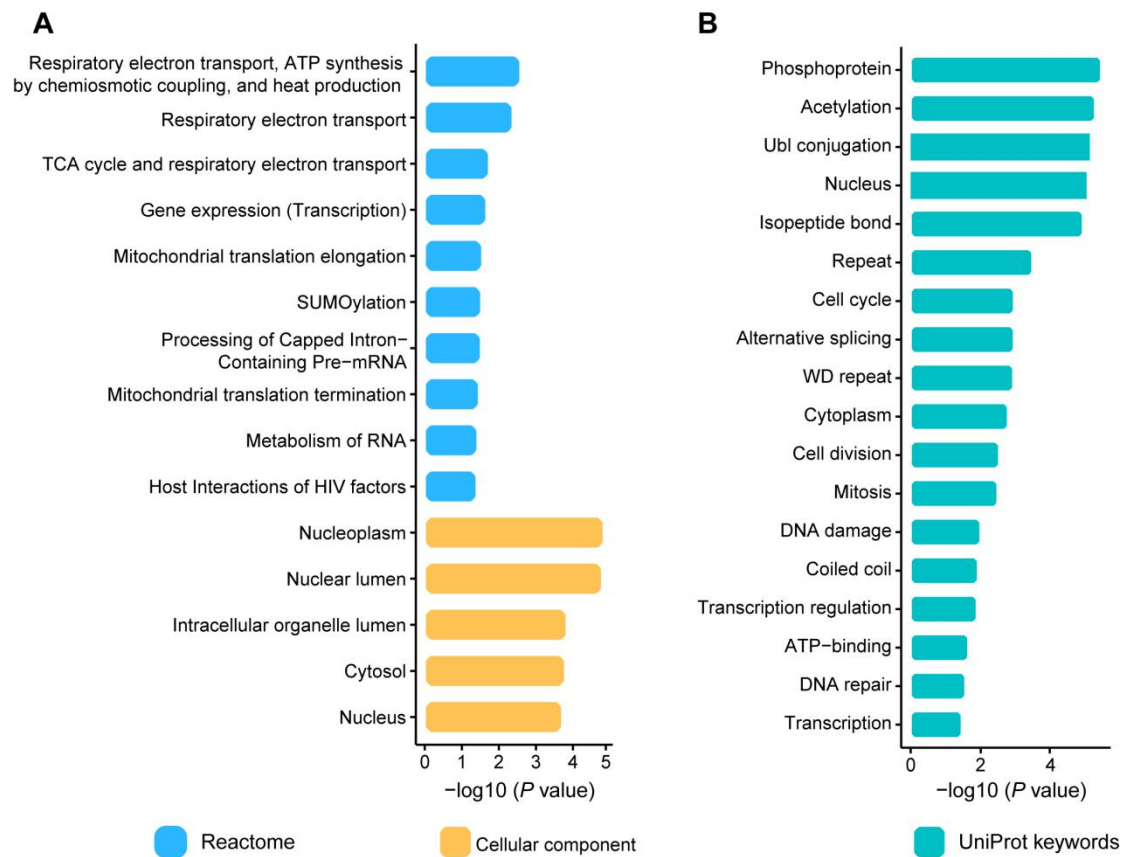

Supplemental Figure S6. Functional analysis of the down-regulated K-acetylation sites induced by SIRT2 overexpression. **A**, Reactome pathway and cellular component enrichment analysis of the proteins containing down-regulated K-acetylation sites in SIRT2-overexpressing cells. **B**, UniProt keywords significantly associated with the down-regulated K-acetylation sites in SIRT2-overexpressing cells. The analysis was conducted by AGOTOOL (<https://agotool.org/>) using the abundance-corrected proteome as the control for statistical analysis ( $P < 0.05$  as cutoff).
